# Supplementary material for: Factors influencing survival and mortality among adult Aboriginal Australians with bronchiectasis—A 10-year retrospective study
Source: PubMed Central journal article supplement (PMC11106411; doi:10.3389/fmed.2024.1366037), 2024-05-07
Supplement: Data_Sheet_1.pdf [file Data_Sheet_1.pdf]

**Supplement 1.** Health district and community locations of surviving and deceased patients

| <b>Health District</b>                                                                                                                                                                                                            | <b>Surviving (n=313)</b> | <b>Deceased (n=146)</b> | <b>RW-p</b> |
|-----------------------------------------------------------------------------------------------------------------------------------------------------------------------------------------------------------------------------------|--------------------------|-------------------------|-------------|
| Darwin Urban                                                                                                                                                                                                                      | 19 (6.1%)                | 15 (10.3%)              | 0.199       |
| Darwin Rural                                                                                                                                                                                                                      | 156 (49.8%)              | 70 (47.9%)              | 0.550       |
| East Arnhem                                                                                                                                                                                                                       | 78 (24.9%)               | 24 (16.4%)              | 0.199       |
| Katherine                                                                                                                                                                                                                         | 60 (19.2%)               | 37 (25.3%)              | 0.265       |
| <b>Community</b>                                                                                                                                                                                                                  | <b>Surviving (n=215)</b> | <b>Deceased (n=103)</b> |             |
| A (n=12)                                                                                                                                                                                                                          | 6 (2.8%)                 | 6 (5.8%)                | 0.900       |
| B (n=28)                                                                                                                                                                                                                          | 18 (8.4%)                | 10 (9.7%)               | 0.988       |
| C (n=16)                                                                                                                                                                                                                          | 10 (4.7%)                | 6 (5.8%)                | 0.988       |
| D (n=22)                                                                                                                                                                                                                          | 12 (5.6%)                | 10 (9.7%)               | 0.850       |
| E (n=14)                                                                                                                                                                                                                          | 12 (5.6%)                | 2 (1.9%)                | 0.875       |
| F (n=41)                                                                                                                                                                                                                          | 23 (10.7%)               | 18 (17.5%)              | 0.850       |
| G (n=23)                                                                                                                                                                                                                          | 14 (6.5%)                | 9 (8.7%)                | 0.975       |
| H (n=17)                                                                                                                                                                                                                          | 12 (5.6%)                | 5 (4.9%)                | 0.988       |
| I (n=82)                                                                                                                                                                                                                          | 58 (27%)                 | 24 (23.3%)              | 0.988       |
| J (n=12)                                                                                                                                                                                                                          | 9 (4.2%)                 | 3 (2.9%)                | 0.988       |
| K (n=16)                                                                                                                                                                                                                          | 14 (6.5%)                | 2 (1.9%)                | 0.513       |
| L (n=20)                                                                                                                                                                                                                          | 15 (7%)                  | 5 (4.9%)                | 0.975       |
| M (n=15)                                                                                                                                                                                                                          | 12 (5.6%)                | 3 (2.9%)                | 0.988       |
| * indicates p-value <0.05                                                                                                                                                                                                         |                          |                         |             |
| Communities' names have been assigned a letter to maintain patient confidentiality. Only remote communities with >10 cases were included for this analysis, therefore total numbers are smaller than numbers of the total cohort. |                          |                         |             |
| <b>Abbreviations:</b> RW-p, Romano-Wolf adjusted p-value                                                                                                                                                                          |                          |                         |             |

**Supplement 2.** Cox univariate and multivariate regression models for mortality reporting HRs (95% CI) including BMI, smoking history and lung function.

| Clinical data                 | Multivariate regression (n=142) | Adjusted p-value | Univariate regressions | Adjusted p-value |
|-------------------------------|---------------------------------|------------------|------------------------|------------------|
| Age                           | 1.06 (1.02, 1.09)               | 0.073            | 1.04 (1.03, 1.06)      | 0.001*           |
| COPD                          | 2.62 (0.3, 22.76)               | 0.876            | 2.3 (1.3, 4.07)        | 0.024*           |
| <i>Haemophilus</i>            | 0.35 (0.15, 0.8)                | 0.226            | 0.8 (0.58, 1.12)       | 0.538            |
| Non- <i>Aspergillus</i> fungi | 2.8 (1.21, 6.49)                | 0.244            | 1.84 (1.31, 2.6)       | 0.008*           |
| <i>Pseudomonas</i>            | 2.4 (1.08, 5.31)                | 0.343            | 1.94 (1.4, 2.71)       | 0.001*           |
| <i>Staphylococcus</i>         | 1.38 (0.57, 3.37)               | 0.876            | 1.56 (1.03, 2.36)      | 0.170            |
| ICU                           | 2.65 (1.25, 5.61)               | 0.219            | 2.28 (1.64, 3.18)      | 0.001*           |
| LABA                          | 1.29 (0.51, 3.3)                | 0.876            | 1.04 (0.75, 1.46)      | 0.802            |
| LAMA                          | 1.61 (0.71, 3.64)               | 0.822            | 0.89 (0.64, 1.23)      | 0.688            |
| BMI                           | 0.88 (0.82, 0.94)               | 0.017*           | 0.92 (0.87, 0.98)      | 0.051            |
| Smoking history               | 0.65 (0.25, 1.66)               | 0.876            | 0.57 (0.25, 1.3)       | 0.538            |
| FEV <sub>1</sub>              | 0.97 (0.94, 1)                  | 0.463            | 0.96 (0.94, 0.99)      | 0.024*           |

\* indicates Romano-Wolf adjusted p-value <0.05

Comorbid lung cancer was excluded from the stepwise regression for these models as less than 10 patients who fit inclusion criteria for these models had lung cancer recorded.

**Abbreviations:** BMI, Body mass index; COPD, Chronic obstructive pulmonary disease; ICU, Intensive care unit; LABA, Long acting beta antagonist; LAMA, Long acting muscarinic agent; FEV<sub>1</sub>, Forced expiratory volume in one second.
